# Supplementary material for: The photoprocess effects of an amino group located at different positions along the polymethine chain in indodicarbocyanine dyes
Source: Royal Society of Chemistry journal article supplement (doi:10.1039/c7ra04556e), 2017-01-01
Supplement: c7ra04556e1.pdf [file c7ra04556e1.pdf]

## Supporting Information

### The photoprocesses effects of amino group located at different positions along the polymethine chain in indodicarbocyanine dyes

Jianfang Cao,<sup>a\*</sup>Jiangli Fan,<sup>b</sup> wen Sun,<sup>b</sup> Yu Guo,<sup>a</sup> Hongmei Wu,<sup>a</sup> and Xiaojun Peng<sup>b\*</sup>

<sup>a</sup>School of Chemical and Environmental Engineering, Liaoning University of Technology, No. 169 Shiyong Road, Guta District, jinzhou 121001, China.

<sup>b</sup> State Key Laboratory of Fine Chemicals, Dalian University of Technology, No. 2 Linggong Road, High-tech District, Dalian 116024, China

E-mail: caojf@lnut.edu.cn

**Table S1** The calculated bond lengths (Å), bond angles (°) and dihedral angles (°) of Cy3 aminocyanine dyes calculated by Gaussian 09 software based on DFT and TDDFT//B3LYP/6-31G(d,p) basis set.

| Dyes                                 |                                      | Atomic Number   | Ground State | Excited State |
|--------------------------------------|--------------------------------------|-----------------|--------------|---------------|
| Cy3-NH <sub>2</sub> -1               | Bond Length (Å)                      | N1- H1          | 1.016        | 1.009         |
|                                      |                                      | N1- H2          | 1.012        | 1.011         |
|                                      |                                      | N1- C1          | 1.418        | 1.346         |
|                                      | Bond angle (°)                       | H1-N1-C1        | 113.627      | 120.133       |
|                                      |                                      | H2-N1-C1        | 113.390      | 123.213       |
|                                      |                                      | H1-N1-H2        | 109.670      | 116.655       |
|                                      | dihedral angle (torsional angle) (°) | H1-N1-C1-C2     | 71.034       | -2.490        |
|                                      |                                      | H2-N1-C1-C3     | 16.016       | -0.887        |
|                                      | Cy3-NH <sub>2</sub> -2               | Bond Length (Å) | N1- H1       | 1.004         |
| N1- H2                               |                                      |                 | 1.006        | 1.012         |
| N1- C1                               |                                      |                 | 1.346        | 1.384         |
| Bond angle (°)                       |                                      | H1-N1-C1        | 121.980      | 116.614       |
|                                      |                                      | H2-N1-C1        | 120.216      | 114.323       |
|                                      |                                      | H1-N1-H2        | 116.482      | 110.830       |
| dihedral angle (torsional angle) (°) |                                      | H1-N1-C1-C2     | -4.759       | 15.410        |
|                                      |                                      | H2-N1-C1-C3     | -18.016      | -35.895       |

**Table S2** The calculated bond lengths (Å), bond angles (°) and dihedral angles (°) Cy7 aminocyanine dyes calculated by Gaussian 09 software based on DFT and TDDFT//B3LYP/6-31G(d,p) basis set.

| Dyes                   |                                      | Atomic Number | Ground State | Excited State |
|------------------------|--------------------------------------|---------------|--------------|---------------|
| Cy7-NH <sub>2</sub> -1 | Bond Length (Å)                      | N1- H1        | 1.016        | 1.012         |
|                        |                                      | N1- H2        | 1.012        | 1.009         |
|                        |                                      | N1- C1        | 1.418        | 1.387         |
|                        | Bond angle (°)                       | H1-N1-C1      | 113.250      | 117.776       |
|                        |                                      | H2-N1-C1      | 112.981      | 117.149       |
|                        | dihedral angle (torsional angle) (°) | H1-N1-H2      | 109.252      | 113.610       |
|                        |                                      | H1-N1-C1-C2   | 66.759       | 42.824        |
|                        |                                      | H2-N1-C1-C3   | 10.286       | 2.773         |
| Cy7-NH <sub>2</sub> -2 | Bond Length (Å)                      | N1- H1        | 1.004        | 1.007         |
|                        |                                      | N1- H2        | 1.007        | 1.011         |
|                        |                                      | N1- C1        | 1.350        | 1.380         |
|                        | Bond angle (°)                       | H1-N1-C1      | 121.874      | 117.298       |
|                        |                                      | H2-N1-C1      | 120.562      | 115.792       |
|                        | dihedral angle (torsional angle) (°) | H1-N1-H2      | 115.573      | 111.587       |
|                        |                                      | H1-N1-C1-C2   | -10.157      | -22.657       |
|                        |                                      | H2-N1-C1-C3   | 7.673        | 25.608        |
| Cy7-NH <sub>2</sub> -3 | Bond Length (Å)                      | N1- H1        | 1.013        | 1.009         |
|                        |                                      | N1- H2        | 1.012        | 1.009         |
|                        |                                      | N1- C1        | 1.401        | 1.373         |
|                        | Bond angle (°)                       | H1-N1-C1      | 113.652      | 118.419       |
|                        |                                      | H2-N1-C1      | 113.927      | 118.370       |
|                        | dihedral angle (torsional angle) (°) | H1-N1-H2      | 108.908      | 113.197       |
|                        |                                      | H1-N1-C1-C2   | 36.933       | 22.984        |
|                        |                                      | H2-N1-C1-C3   | -21.666      | -16.169       |
| Cy7-NH <sub>2</sub> -4 | Bond Length (Å)                      | N1- H1        | 1.006        | 1.011         |
|                        |                                      | N1- H2        | 1.006        | 1.011         |
|                        |                                      | N1- C1        | 1.349        | 1.385         |
|                        | Bond angle (°)                       | H1-N1-C1      | 121.934      | 115.674       |
|                        |                                      | H2-N1-C1      | 121.933      | 115.671       |
|                        | dihedral angle (torsional angle) (°) | H1-N1-H2      | 116.113      | 110.713       |
|                        |                                      | H1-N1-C1-C2   | -0.835       | -25.847       |
|                        |                                      | H2-N1-C1-C3   | 0.979        | 25.911        |

**Table S3** The calculated bond lengths (Å), bond angles (°) and dihedral angles (°) of Cy9 aminocyanine dyes calculated by Gaussian 09 software based on DFT and TDDFT//B3LYP/6-31G(d,p) basis set.

| Dyes                   |                                      | Atomic Number | Ground State | Excited State |
|------------------------|--------------------------------------|---------------|--------------|---------------|
| Cy9-NH <sub>2</sub> -1 | Bond Length (Å)                      | N1- H1        | 1.016        | 1.012         |
|                        |                                      | N1- H2        | 1.012        | 1.010         |
|                        |                                      | N1- C1        | 1.418        | 1.392         |
|                        | Bond angle (°)                       | H1-N1-C1      | 113.283      | 116.812       |
|                        |                                      | H2-N1-C1      | 113.008      | 116.290       |
|                        |                                      | H1-N1-H2      | 109.274      | 112.680       |
|                        | dihedral angle (torsional angle) (°) | H1-N1-C1-C2   | 66.180       | 46.400        |
| H2-N1-C1-C3            |                                      | 9.710         | 1.993        |               |
| Cy9-NH <sub>2</sub> -2 | Bond Length (Å)                      | N1- H1        | 1.004        | 1.007         |
|                        |                                      | N1- H2        | 1.007        | 1.011         |
|                        |                                      | N1- C1        | 1.349        | 1.377         |
|                        | Bond angle (°)                       | H1-N1-C1      | 121.980      | 117.674       |
|                        |                                      | H2-N1-C1      | 120.871      | 116.300       |
|                        |                                      | H1-N1-H2      | 115.896      | 111.964       |
|                        | dihedral angle (torsional angle) (°) | H1-N1-C1-C2   | -11.807      | -22.467       |
| H2-N1-C1-C3            |                                      | 2.214         | 23.811       |               |
| Cy9-NH <sub>2</sub> -3 | Bond Length (Å)                      | N1- H1        | 1.013        | 1.010         |
|                        |                                      | N1- H2        | 1.012        | 1.009         |
|                        |                                      | N1- C1        | 1.400        | 1.375         |
|                        | Bond angle (°)                       | H1-N1-C1      | 113.786      | 117.878       |
|                        |                                      | H2-N1-C1      | 113.992      | 117.670       |
|                        |                                      | H1-N1-H2      | 108.993      | 112.630       |
|                        | dihedral angle (torsional angle) (°) | H1-N1-C1-C2   | 35.728       | 23.102        |
| H2-N1-C1-C3            |                                      | -22.552       | -19.295      |               |
| Cy9-NH <sub>2</sub> -4 | Bond Length (Å)                      | N1- H1        | 1.007        | 1.011         |
|                        |                                      | N1- H2        | 1.007        | 1.011         |
|                        |                                      | N1- C1        | 1.350        | 1.384         |
|                        | Bond angle (°)                       | H1-N1-C1      | 121.670      | 115.953       |
|                        |                                      | H2-N1-C1      | 121.473      | 116.146       |
|                        |                                      | H1-N1-H2      | 116.037      | 111.122       |
|                        | dihedral angle (torsional angle) (°) | H1-N1-C1-C2   | -10.231      | -29.056       |
| H2-N1-C1-C3            |                                      | 1.324         | 21.065       |               |
| Cy9-NH <sub>2</sub> -5 | Bond Length (Å)                      | N1- H1        | 1.012        | 1.009         |
|                        |                                      | N1- H2        | 1.012        | 1.009         |
|                        |                                      | N1- C1        | 1.399        | 1.372         |
|                        | Bond angle (°)                       | H1-N1-C1      | 114.050      | 118.329       |
|                        |                                      | H2-N1-C1      | 114.050      | 118.328       |
|                        |                                      | H1-N1-H2      | 109.275      | 113.324       |
|                        | dihedral angle (torsional angle) (°) | H1-N1-C1-C2   | 28.790       | 19.581        |
| H2-N1-C1-C3            |                                      | -28.796       | -19.593      |               |

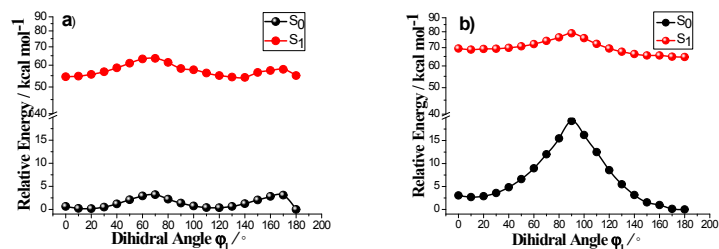

**Fig. S1** Energy levels of the  $S_0$  (black) and  $S_1$  (red) states of Cy3-NH<sub>2</sub>-1(a) and Cy3-NH<sub>2</sub>-2(b) rotation around chemical bond (dihedral angle  $\varphi_1$ ) calculated at the TD-DFT/B3LYP/6-31G(d,p) level with PCM solvation model.

**Table S4** Energy barrier  $E_a$  and energy gap  $E_{\text{gap}}$  between the  $S_0$  and  $S_1$  states of Cy3-NH<sub>2</sub>-1(a) and Cy3-NH<sub>2</sub>-2(b) rotation around chemical bond C<sub>1</sub>-N<sub>1</sub> (dihedral angle  $\varphi_1$ ) in the  $S_0$  and  $S_1$  states.

|                                            | Cy3-NH <sub>2</sub> -1 | Cy3-NH <sub>2</sub> -2 |
|--------------------------------------------|------------------------|------------------------|
|                                            | $\varphi_1$            | $\varphi_1$            |
| $E_a$ (kcal•mol <sup>-1</sup> )            | 2.95                   | 7.30                   |
| $E_{\text{gap}}$ (kcal•mol <sup>-1</sup> ) | 52.92                  | 47.41                  |

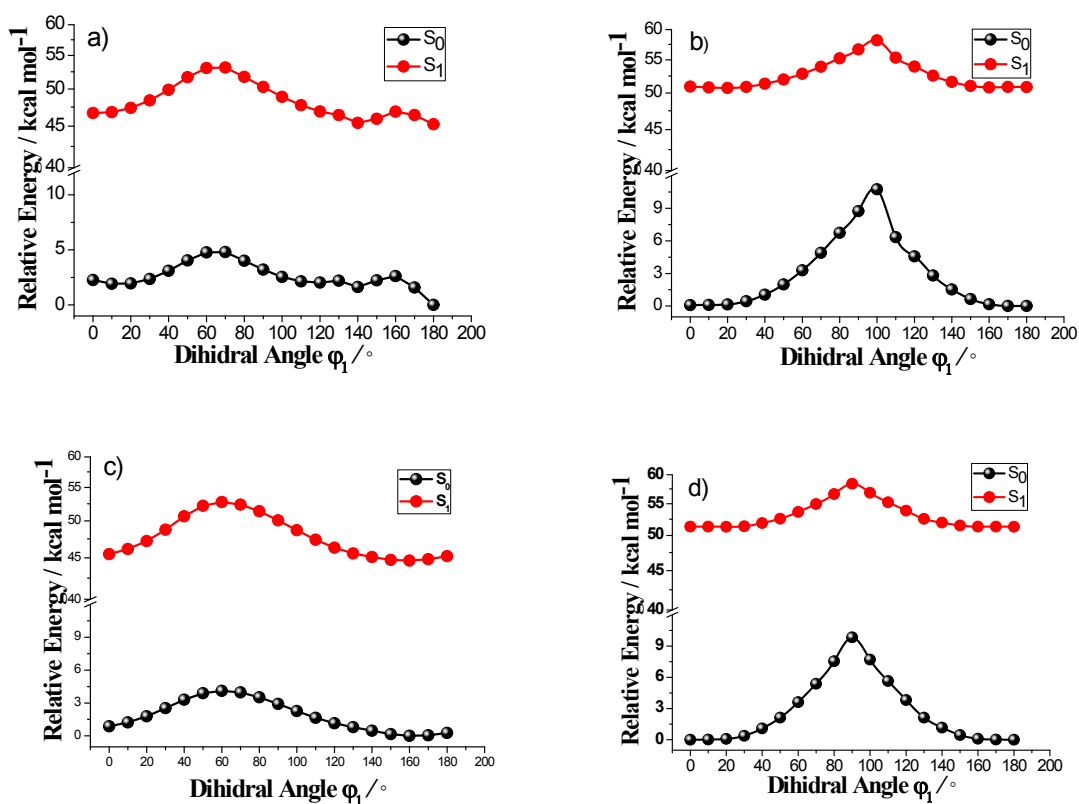

**Fig. S2** Energy levels of the  $S_0$  (black) and  $S_1$  (red) states of Cy7-NH<sub>2</sub>-1(a), Cy7-NH<sub>2</sub>-2(b), Cy7-NH<sub>2</sub>-3(c) and Cy7-NH<sub>2</sub>-4(d) rotation around chemical bond (dihedral angle  $\varphi_1$ ) calculated at the TD-DFT/B3LYP/6-31G(d,p) level with PCM solvation model.

Table S5 Energy barrier  $E_a$  and energy gap  $E_{\text{gap}}$  between the  $S_0$  and  $S_1$  states of Cy7-NH<sub>2</sub>-1, Cy7-NH<sub>2</sub>-2, Cy7-NH<sub>2</sub>-3 and Cy7-NH<sub>2</sub>-4 rotation around chemical bond C<sub>1</sub>-N<sub>1</sub> (dihedral angle  $\varphi_1$ ) in the  $S_0$  and  $S_1$  states.

|                                            | Cy7-NH <sub>2</sub> -1 | Cy7-NH <sub>2</sub> -2 | Cy7-NH <sub>2</sub> -3 | Cy7-NH <sub>2</sub> -4 |
|--------------------------------------------|------------------------|------------------------|------------------------|------------------------|
|                                            | $\varphi_1$            | $\varphi_1$            | $\varphi_1$            | $\varphi_1$            |
| $E_a$ (kcal•mol <sup>-1</sup> )            | 0.06                   | 7.30                   | 0.10                   | 7.09                   |
| $E_{\text{gap}}$ (kcal•mol <sup>-1</sup> ) | 43.71                  | 47.41                  | 49.52                  | 48.57                  |

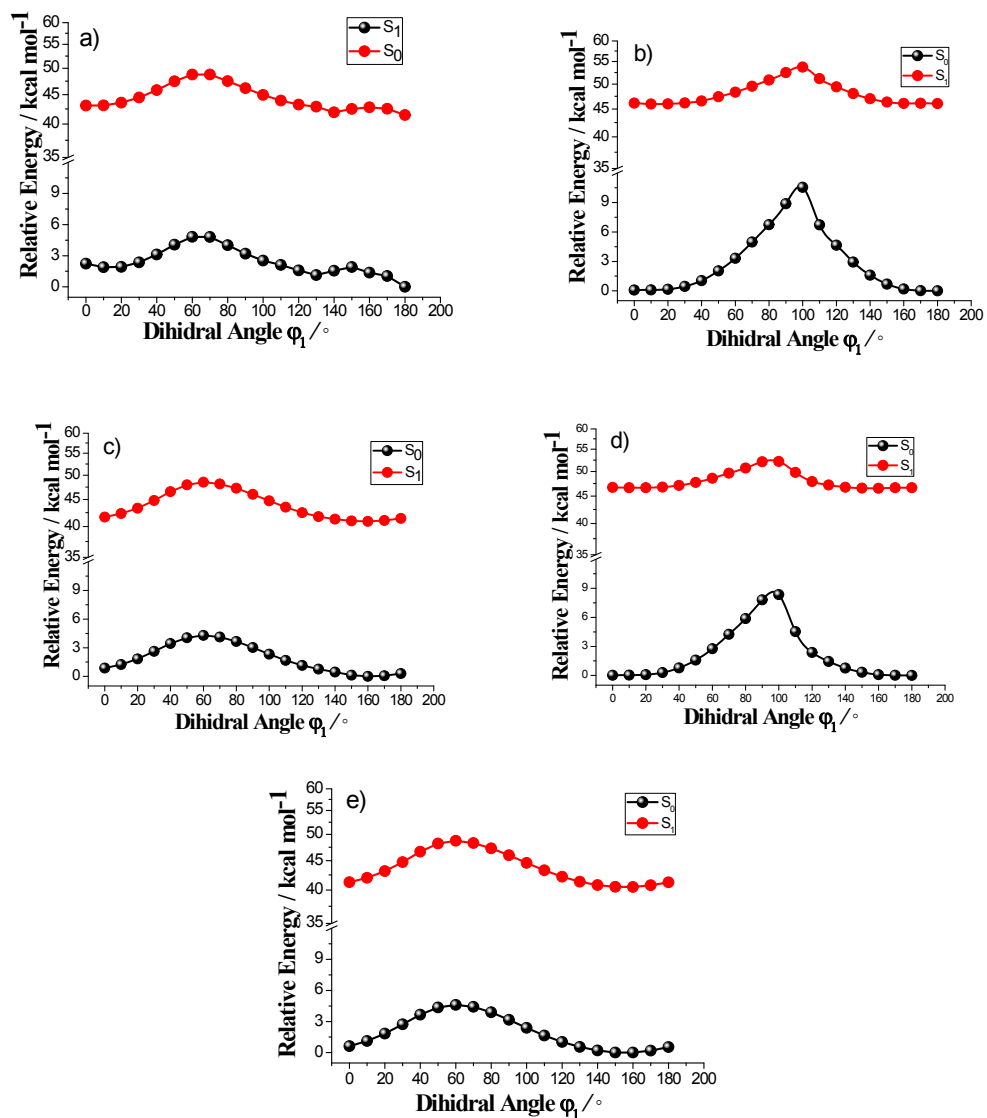

Fig. S3 Energy levels of the  $S_0$  (black) and  $S_1$  (red) states of Cy9-NH<sub>2</sub>-1(a), Cy9-NH<sub>2</sub>-2(b), Cy9-NH<sub>2</sub>-3(c), Cy9-NH<sub>2</sub>-4(d) and Cy9-NH<sub>2</sub>-5(e) rotation around chemical bond (dihedral angle  $\varphi_1$ ) calculated at the TD-DFT/B3LYP/6-31G(d,p) level with PCM solvation model.

**Table S6** Energy barrier  $E_a$  and energy gap  $E_{\text{gap}}$  between the  $S_0$  and  $S_1$  states of Cy9-NH<sub>2</sub>-1, Cy9-NH<sub>2</sub>-2, Cy9-NH<sub>2</sub>-3, Cy9-NH<sub>2</sub>-4 and Cy9-NH<sub>2</sub>-5 rotation around chemical bond C<sub>1</sub>-N<sub>1</sub> (dihedral angle  $\varphi_1$ ) in the  $S_0$  and  $S_1$  states.

|                                            | Cy9-NH <sub>2</sub> -1 | Cy9-NH <sub>2</sub> -2 | Cy5-NH <sub>2</sub> -3 | Cy5-NH <sub>2</sub> -4 | Cy5-NH <sub>2</sub> -5 |
|--------------------------------------------|------------------------|------------------------|------------------------|------------------------|------------------------|
|                                            | $\varphi_1$            | $\varphi_1$            | $\varphi_1$            | $\varphi_1$            | $\varphi_1$            |
| $E_a$ (kcal•mol <sup>-1</sup> )            | 0.95                   | 7.65                   | 0.07                   | 6.56                   | 0.01                   |
| $E_{\text{gap}}$ (kcal•mol <sup>-1</sup> ) | 40.36                  | 46.06                  | 40.85                  | 43.84                  | 40.50                  |
